# Supplementary material
Source: publisher site journal article supplement (https://www.dovepress.com/article/499820)
Supplement: Supplementary file 1 [file get_supplementary_file.php]

Supplementary Material for:

**A molecular signature of the ubiquitin-proteasome system for forecasting prognosis in thyroid carcinoma patients**

Hong Zeng1,2,+, Xitong Geng2,+, Hao Wan3,+, Xiaoyu Qu2, Shengwei Tang2, Ruiyu Zhang3, Minqin Zhou2, Zichuan Yu2, Jingying Pan3, Hao Zheng2, Yanting Zhu2, Shuhan Huang2, Da Huang1*

1Second Afﬁliated Hospital of Nanchang University, Nanchang, Jiangxi Province, People’s Republic of China;

2Second College of Clinical Medicine, Nanchang university, Nanchang, Jiangxi Province, People’s Republic of China;

3First College of Clinical Medicine, Nanchang university, Nanchang, Jiangxi Province, People’s Republic of China;

+These authors contributed equally to this work

*Correspondence: Da Huang, Department of Thyroid surgery, Second Affiliated Hospital of Nanchang University, 1 Minde Road, Nanchang, Jiangxi Province, 330000, People’s Republic of China, E-mail: danmo0904@163.com.

**This supplementary material includes 3 figures and 5 table.**

**Supplementary Figures: Supplementary Figure 1- Supplementary Figure 3.**

**Supplementary Tables: Supplementary Table 1- Supplementary Table 5.**

**Supplemental figures**


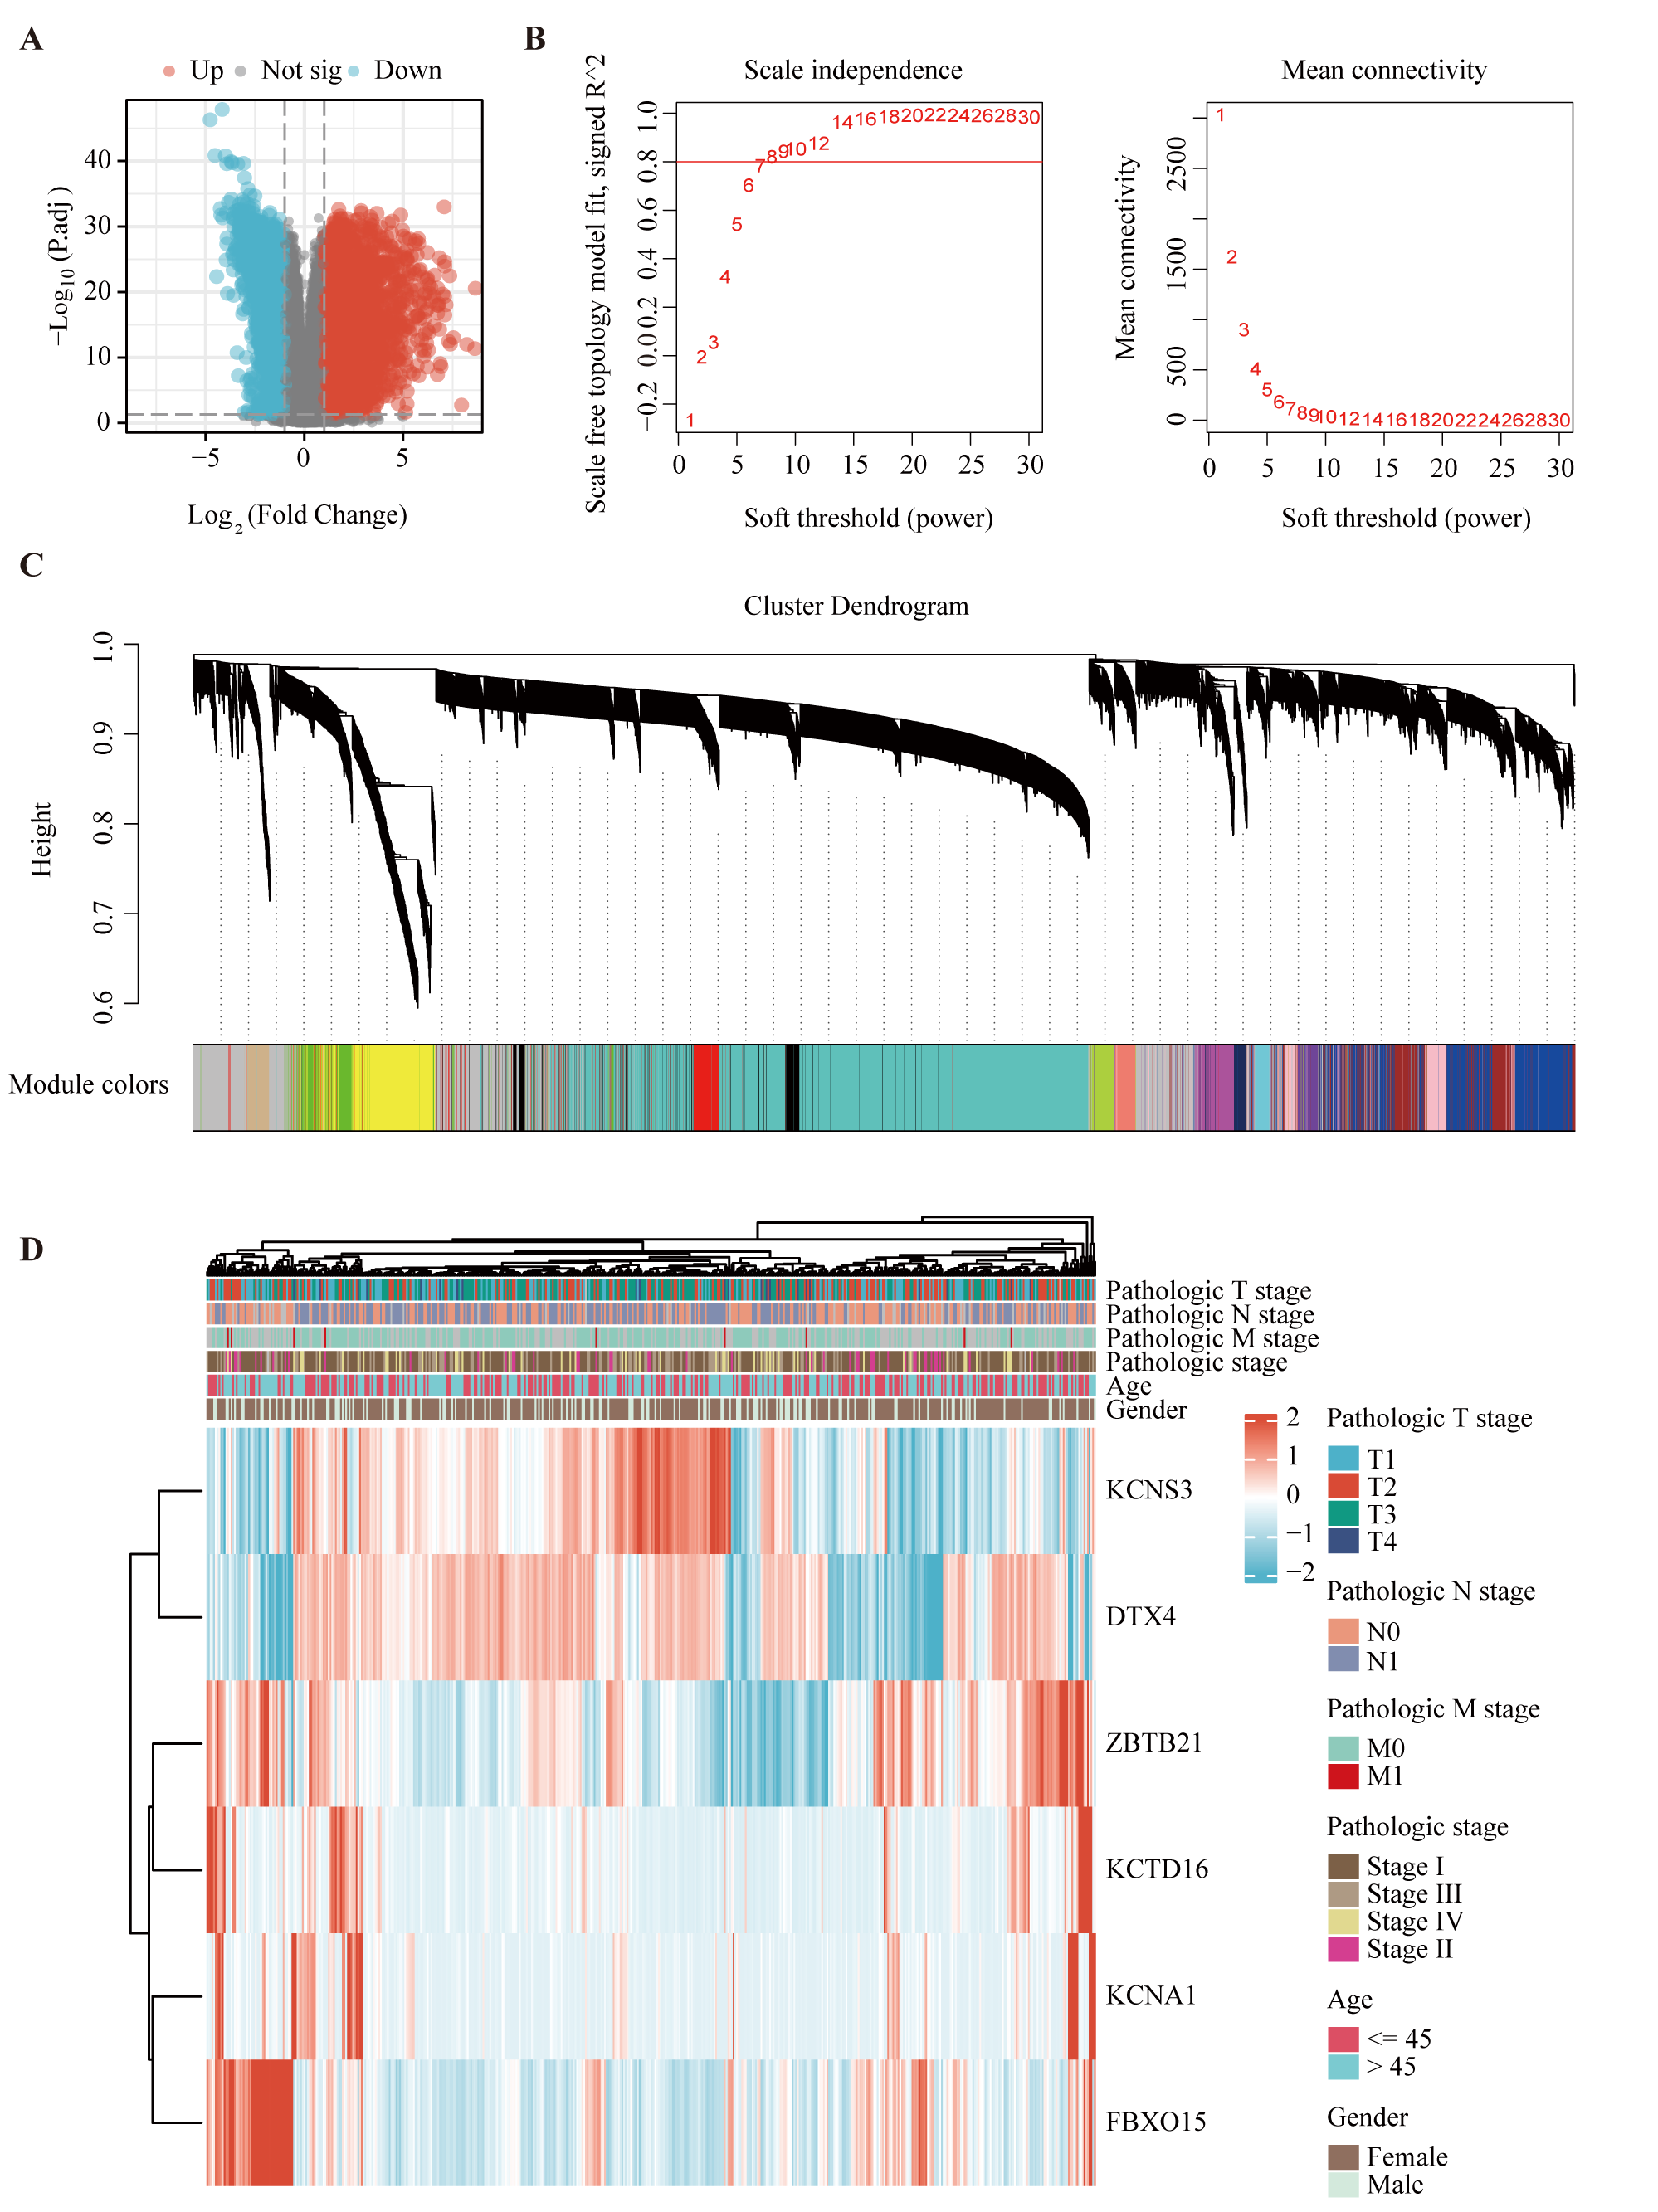


**Supplemental figure 1. Identification of key genes. (A)** Differentially expressed genes were identified from TCGA-THCA dataset. **(B, C)** WGCNA was utilized for consensus cluster analysis. **(D)** Relationship between six core genes and clinicopathological features.


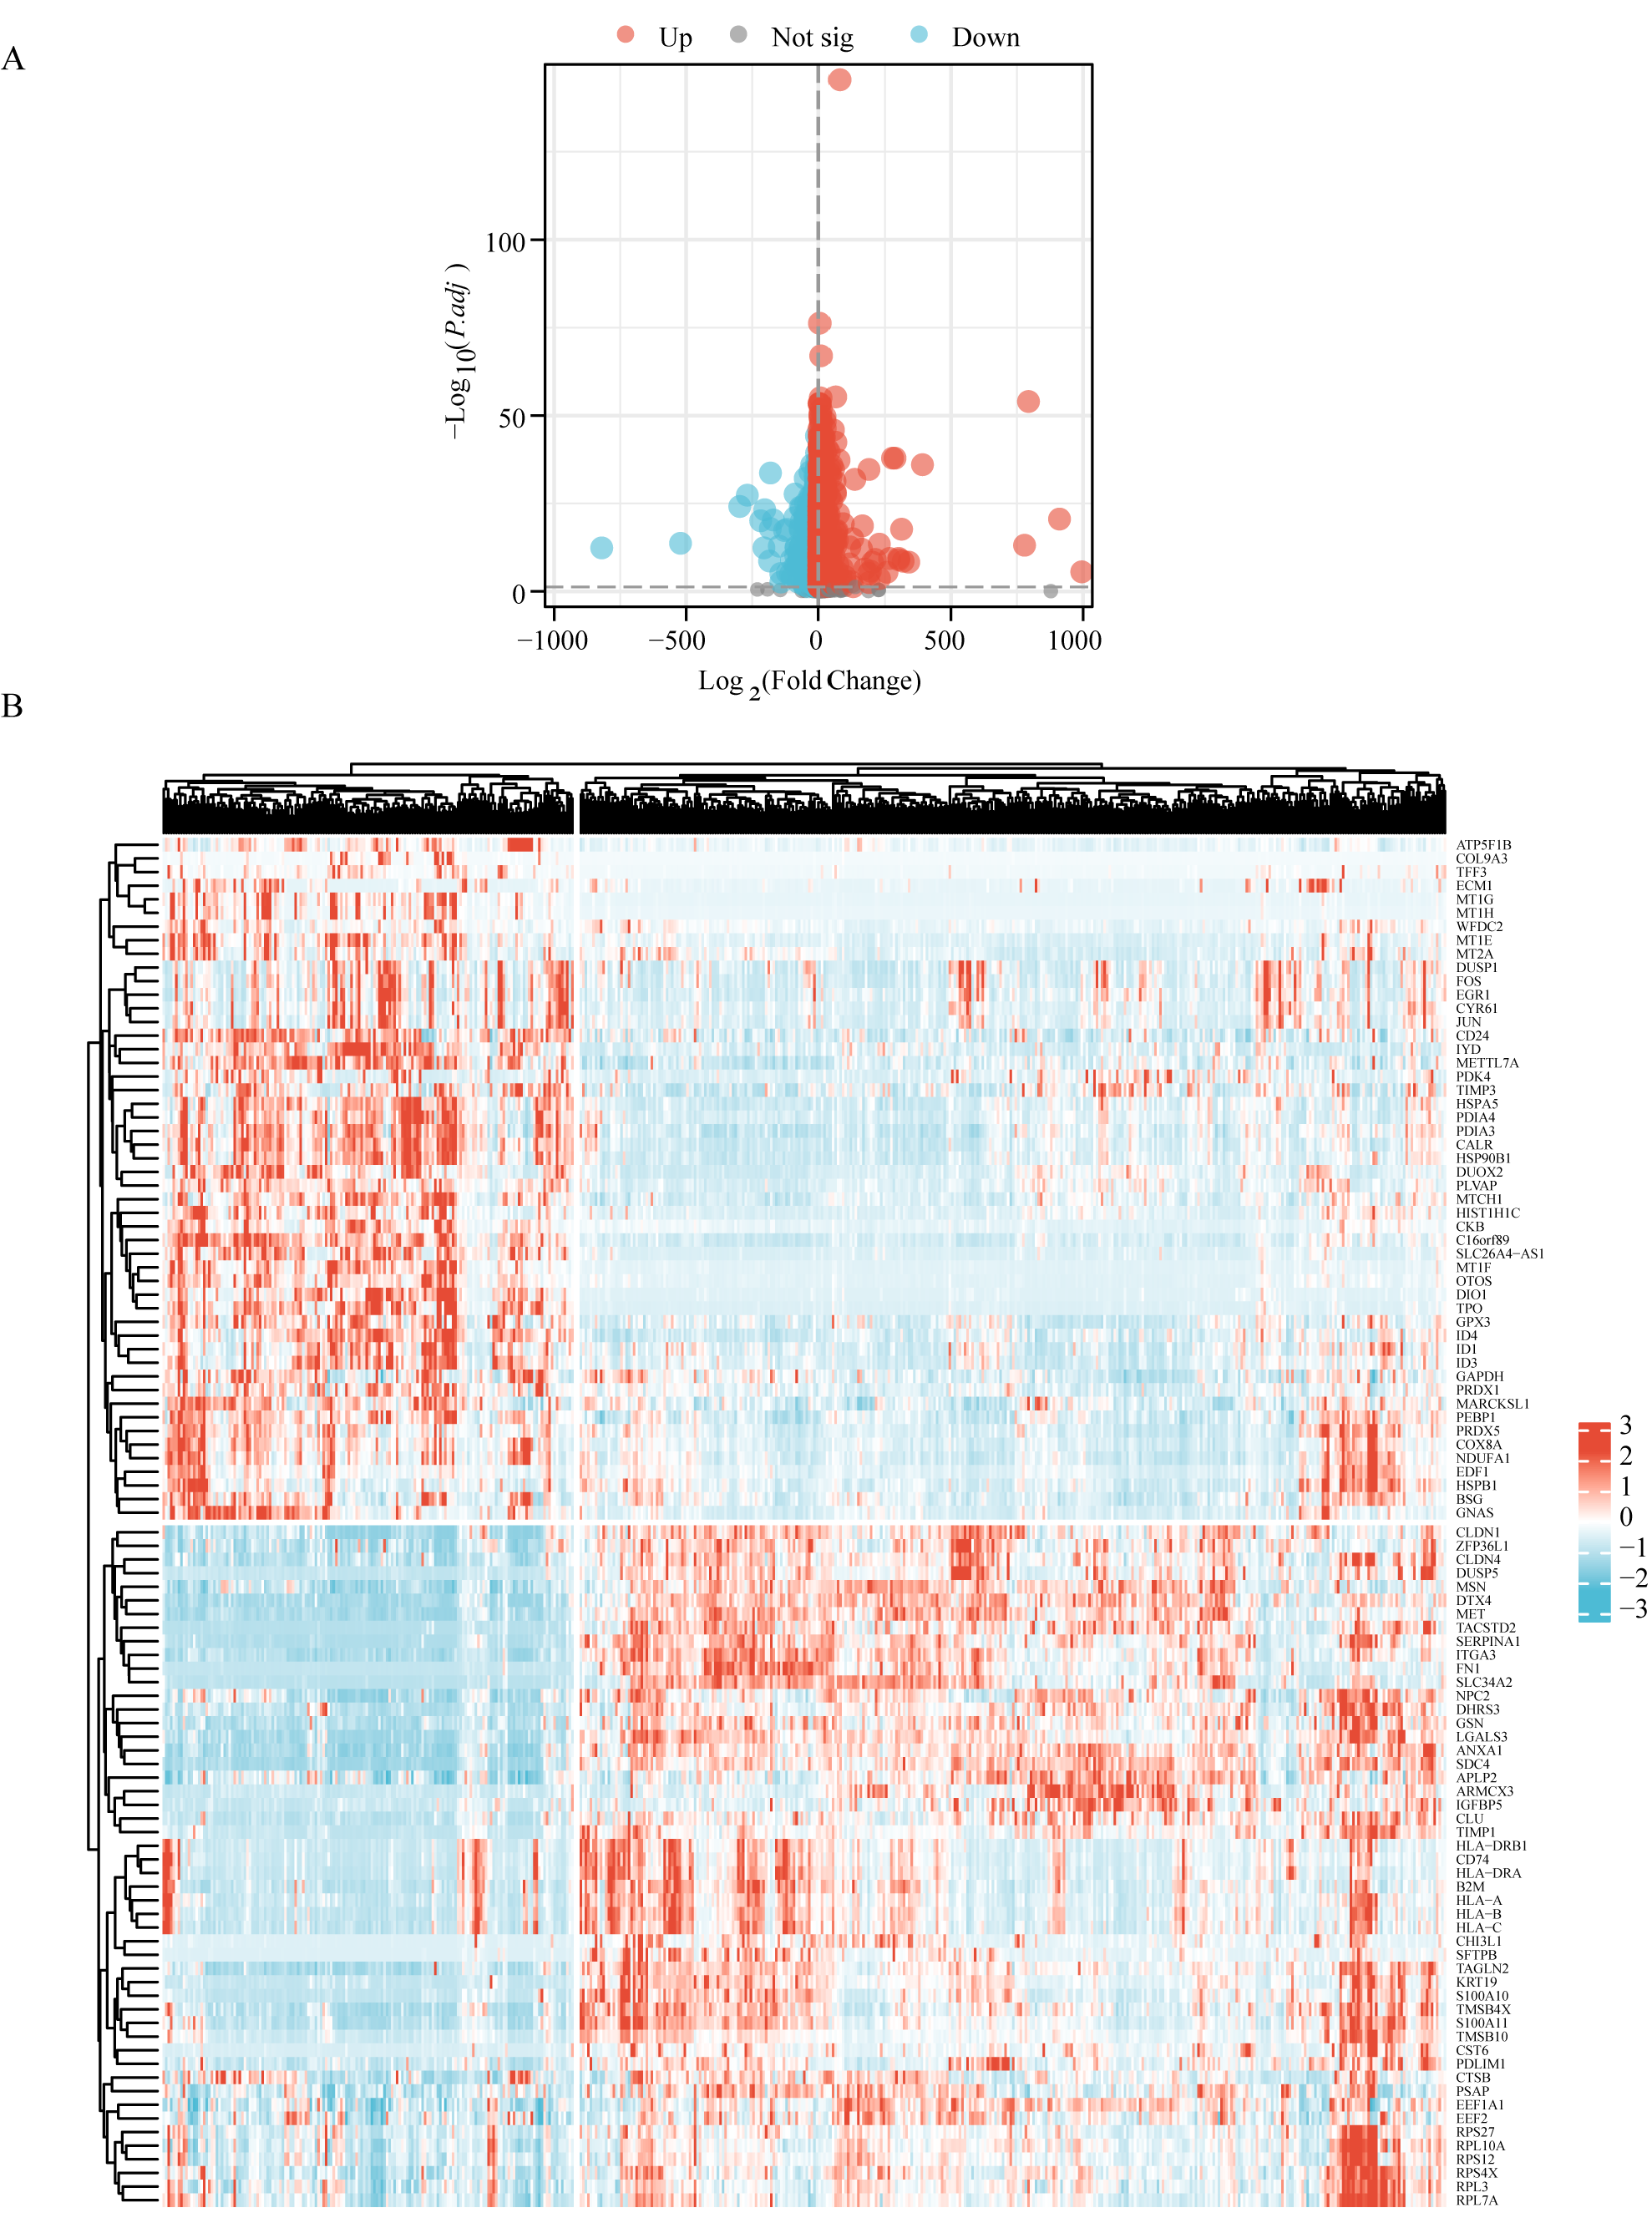


**Supplemental figure 2.** **Identification of differentially expressed genes (DEGs) between high and low UPS-PMS group**. **(A)** Volcano plot illustrating differentially expressed genes (DEGs) between the two isoforms(logFC >2, *p* < 0. 05). **(B)** Heatmap representation of the top 100 UPSPM-related DEGs (50 up-regulated,50 down-regulated) across two THCA subtypes.


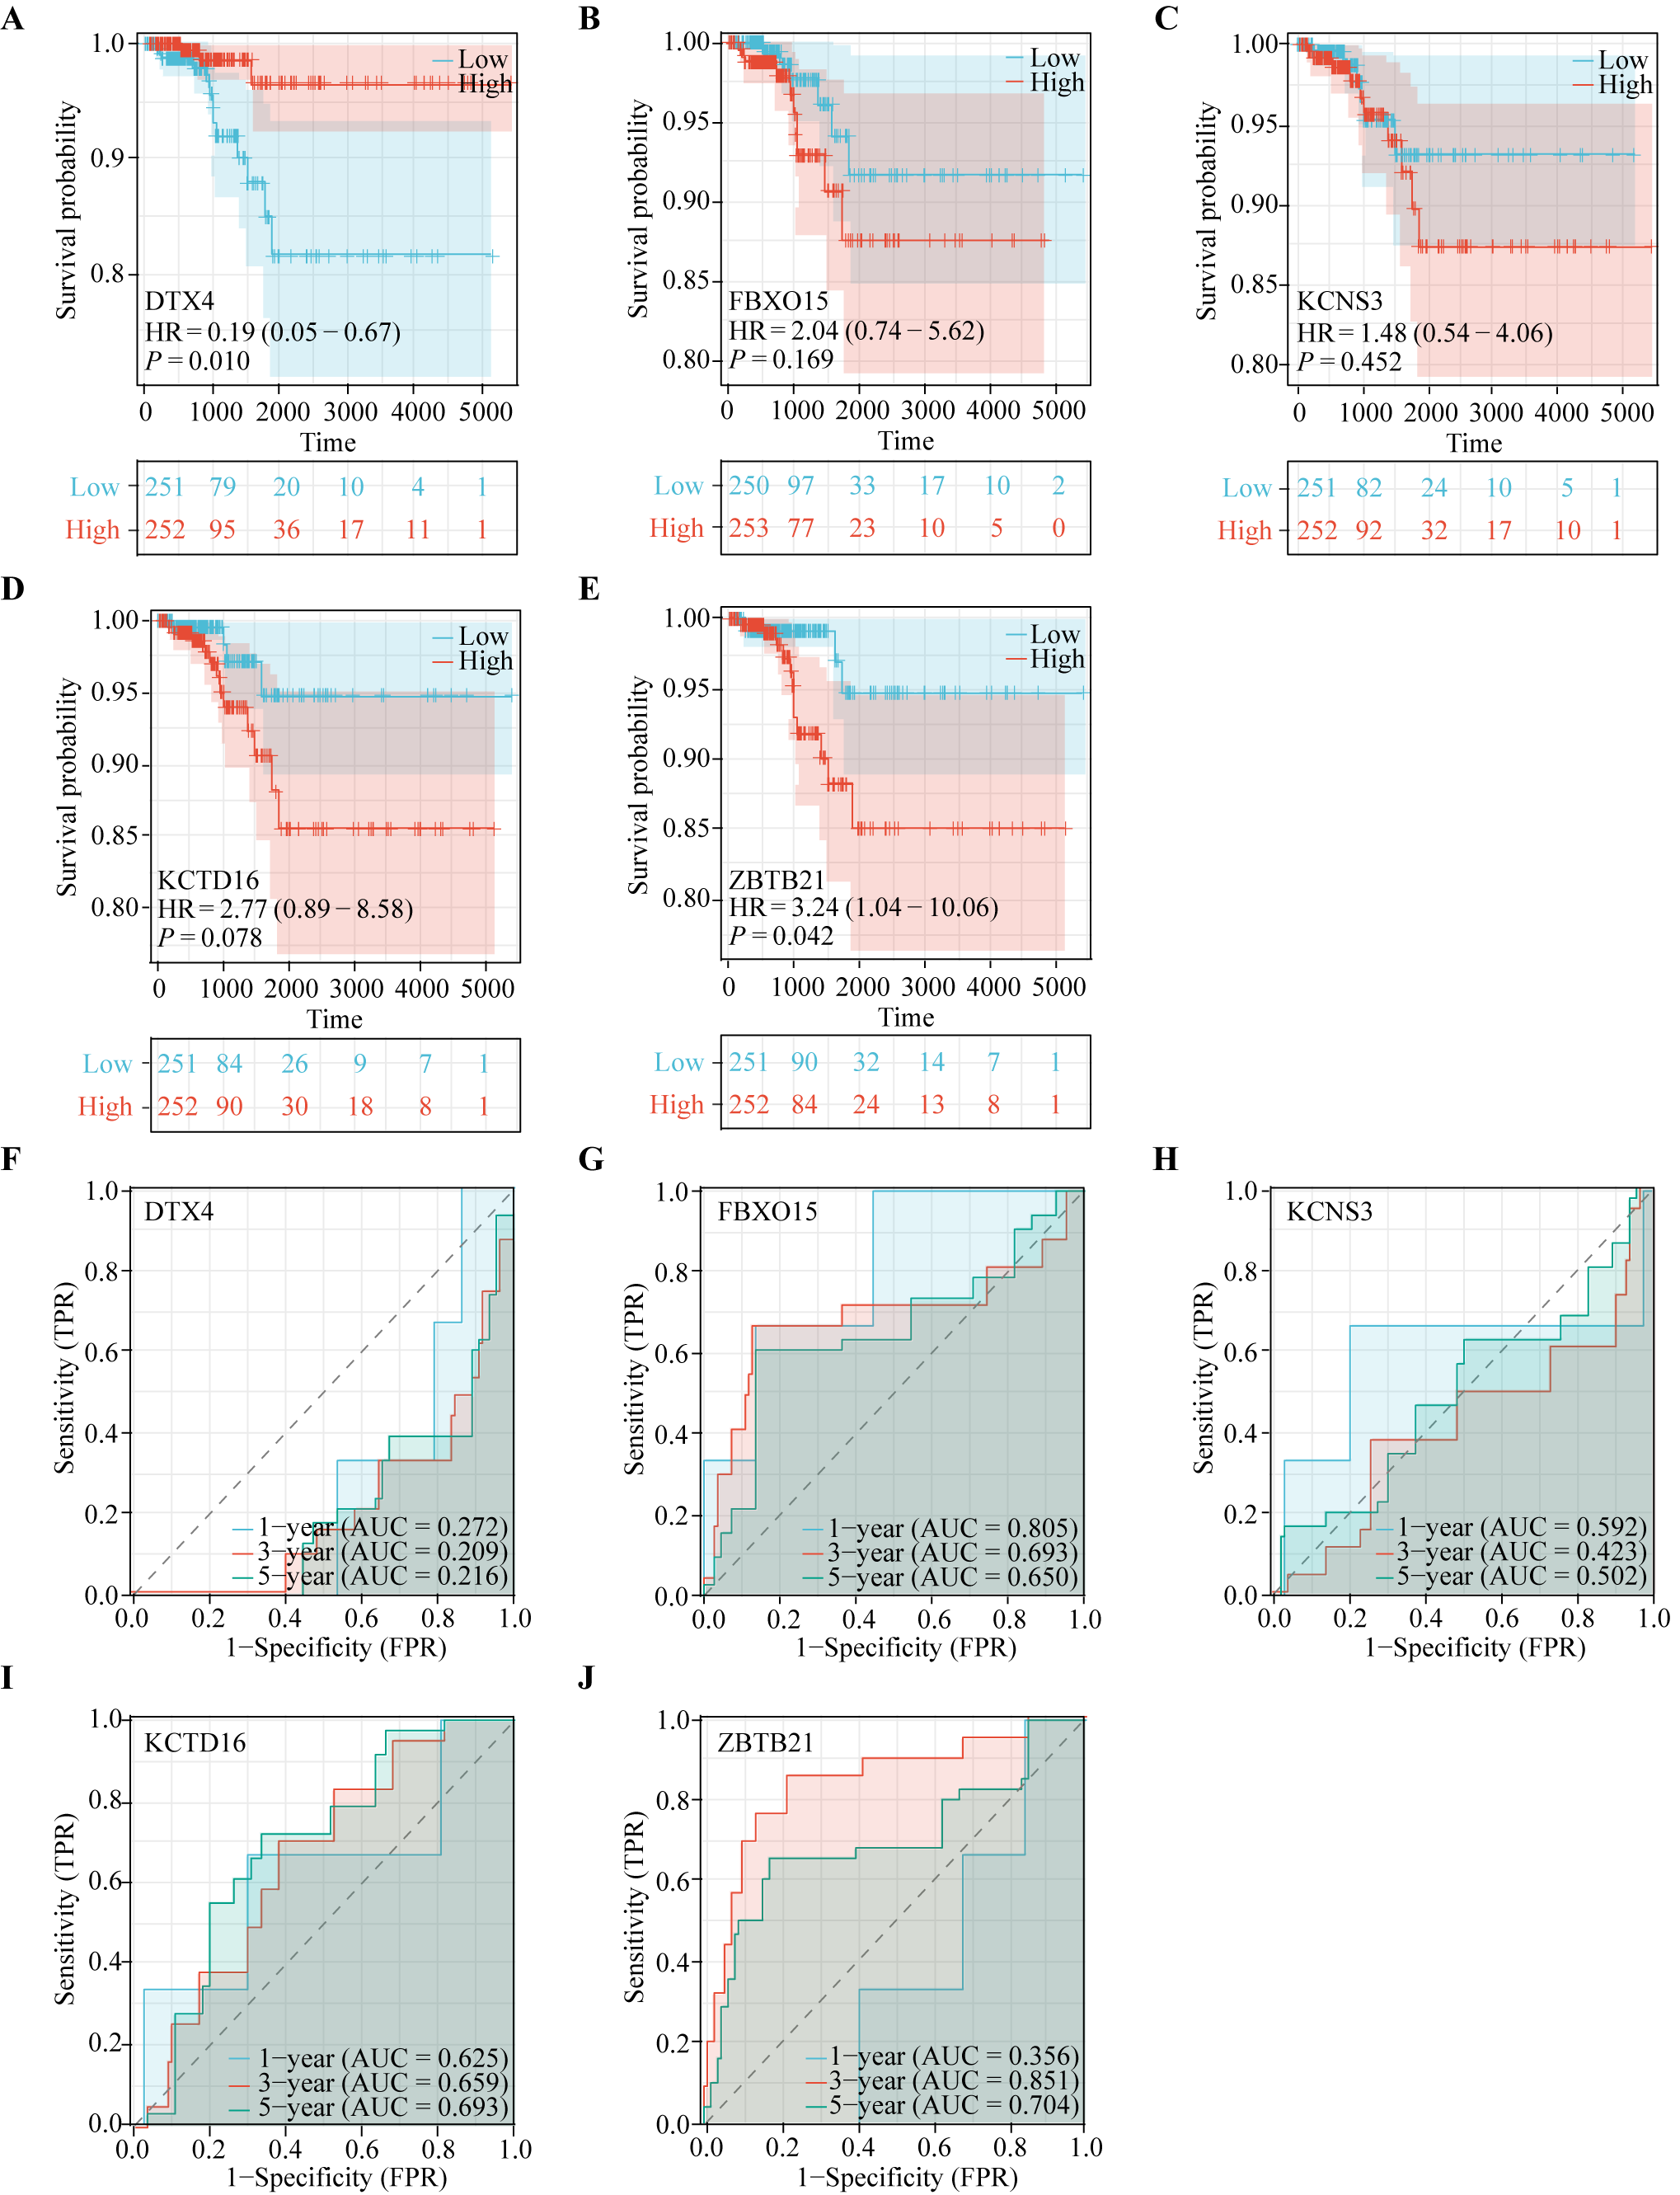
**Supplemental figure 3. The survival analysis of UPS-PM genes in THCA.** (A-E) The survival analysis of (A) DTX4, (B) FBXO15, (C) KCNS3, (D) KCTD16, (E) ZBTB21, (F-J) The area under the curve of (F) DTX4, (G) FBXO15, (H) KCNS3, (I) KCTD16, (J) ZBTB21.

## **Supplementary Tables**

## **Supplementary Table 1:** The ubiquitin proteasome system related genes.

| UPS system | | | |
| --- | --- | --- | --- |
| UBE2QL1 | FBXL18 | PEX12 | TRIML1 |
| ABTB2 | FBXL2 | PEX2 | TRIP12 |
| ASB15 | FBXL20 | PHF7 | TTC3 |
| BIRC7 | FBXL3 | PHRF1 | TULP4 |
| BTBD11 | FBXL4 | PJA1 | UBE3A |
| DTX4 | FBXL5 | PJA2 | UBE3B |
| ENC1 | FBXL6 | PML | UBE3C |
| FBXO15 | FBXL7 | PPIL2 | UBE4A |
| FBXO17 | FBXL8 | PRPF19 | UBE4B |
| FBXO2 | FBXO10 | RAB40A | UBR1 |
| FBXO30 | FBXO11 | RAB40AL | UBR2 |
| FBXO41 | FBXO16 | RAB40B | UBR3 |
| HECW1 | FBXO18 | RAB40C | UBR4 |
| KBTBD8 | FBXO21 | RABGEF1 | UBR5 |
| KCNA1 | FBXO22 | RAD18 | UHRF1 |
| KCNA2 | FBXO24 | RAPSN | UHRF2 |
| KCNA3 | FBXO25 | RBBP6 | UNK |
| KCNA6 | FBXO27 | RBCK1 | UNKL |
| KCND2 | FBXO28 | RBX1 | VHL |
| KCND3 | FBXO3 | RC3H1 | VPS11 |
| KCNS3 | FBXO31 | RC3H2 | VPS18 |
| KCNV1 | FBXO32 | RCBTB1 | VPS41 |
| KCTD16 | FBXO33 | RCBTB2 | VPS8 |
| KCTD4 | FBXO34 | RCHY1 | WDSUB1 |
| KCTD7 | FBXO36 | RFFL | WHSC1 |
| KCTD8 | FBXO38 | RFPL1 | WSB1 |
| KLHL10 | FBXO4 | RFPL3 | WSB2 |
| KLHL30 | FBXO40 | RFPL4B | WWP1 |
| KLHL33 | FBXO42 | RFWD2 | WWP2 |
| KLHL34 | FBXO44 | RFWD3 | XIAP |
| KLHL4 | FBXO45 | RHOBTB1 | ZBTB1 |
| LONRF2 | FBXO46 | RHOBTB2 | ZBTB10 |
| LONRF3 | FBXO5 | RING1 | ZBTB11 |
| MARCH10 | FBXO6 | RLIM | ZBTB12 |
| MARCH11 | FBXO7 | RNF10 | ZBTB17 |
| MARCH4 | FBXO8 | RNF103 | ZBTB2 |
| MEX3A | FBXO9 | RNF11 | ZBTB20 |
| NEURL1 | FBXW11 | RNF111 | ZBTB22 |
| PDZRN4 | FBXW2 | RNF112 | ZBTB24 |
| RAG1 | FBXW4 | RNF113A | ZBTB25 |
| RFPL4A | FBXW5 | RNF113B | ZBTB26 |
| RHOBTB3 | FBXW7 | RNF114 | ZBTB3 |
| RNF150 | FBXW8 | RNF115 | ZBTB32 |
| RNF175 | G2E3 | RNF121 | ZBTB33 |
| RNF183 | GAN | RNF122 | ZBTB37 |
| RNF24 | GMCL1 | RNF123 | ZBTB38 |
| RNF39 | GTF2H2 | RNF125 | ZBTB39 |
| SH3RF1 | GZF1 | RNF126 | ZBTB4 |
| SHPRH | HACE1 | RNF128 | ZBTB40 |
| TRIM15 | HECTD1 | RNF13 | ZBTB41 |
| TRIM36 | HECTD2 | RNF130 | ZBTB43 |
| TRIM46 | HECTD3 | RNF133 | ZBTB44 |
| TRIM47 | HECW2 | RNF135 | ZBTB45 |
| TRIM54 | HERC1 | RNF138 | ZBTB46 |
| TRIM58 | HERC2 | RNF139 | ZBTB48 |
| TRIM63 | HERC3 | RNF14 | ZBTB49 |
| UBOX5 | HERC4 | RNF141 | ZBTB5 |
| ZBTB16 | HERC5 | RNF144A | ZBTB6 |
| ZBTB21 | HERC6 | RNF144B | ZBTB7A |
| PSMA8 | HIC1 | RNF145 | ZBTB7B |
| PSMB11 | HIC2 | RNF146 | ZBTB7C |
| OTUD7A | HLTF | RNF148 | ZBTB8A |
| OTUD7B | HUWE1 | RNF149 | ZBTB9 |
| PSMD14 | IBTK | RNF151 | ZFAND3 |
| PSMD7 | IPP | RNF152 | ZFAND5 |
| TNFAIP3 | ITCH | RNF157 | ZFAND6 |
| USP17L2 | IVNS1ABP | LTN1 | ZBTB14 |
| USP44 | KLHL41 | RNF165 | ZFPL1 |
| USP49 | KBTBD11 | RNF166 | ZNF131 |
| USP54 | KBTBD12 | RNF167 | ZBTB18 |
| UBA1 | KBTBD2 | RNF168 | ZNF598 |
| UBA2 | KBTBD3 | RNF169 | ZNF645 |
| UBA3 | KBTBD4 | RNF17 | ZNRF1 |
| UBA5 | KLHL40 | RNF170 | ZNRF2 |
| UBA6 | KBTBD6 | RNF180 | ZNRF3 |
| UBA7 | KBTBD7 | RNF181 | ZNRF4 |
| ATG7 | KCNA10 | RNF182 | ZSWIM2 |
| MOCS3 | KCNA4 | RNF185 | PSMA1 |
| NAE1 | KCNA5 | RNF186 | PSMA2 |
| SAE1 | KCNA7 | RNF187 | PSMA3 |
| UBE2A | KCNB1 | RNF19A | PSMA4 |
| UBE2B | KCNB2 | RNF19B | PSMA5 |
| UBE2C | KCNC1 | RNF2 | PSMA6 |
| UBE2D1 | KCNC2 | RNF20 | PSMA7 |
| UBE2D2 | KCNC3 | RNF207 | PSMB1 |
| UBE2D3 | KCNC4 | RNF208 | PSMB10 |
| UBE2D4 | KCND1 | RNF212 | PSMB2 |
| UBE2E1 | KCNG1 | RNF213 | PSMB3 |
| UBE2E2 | KCNG3 | RNF214 | PSMB4 |
| UBE2E3 | KCNRG | RNF215 | PSMB5 |
| UBE2F | KCNS1 | RNF216 | PSMB6 |
| UBE2G1 | KCNS2 | RNF217 | PSMB7 |
| UBE2G2 | KCTD1 | RNF219 | PSMB8 |
| UBE2H | KCTD10 | RNF220 | PSMB9 |
| UBE2I | KCTD12 | RNF25 | PSMC1 |
| UBE2J1 | KCTD13 | RNF26 | PSMC2 |
| UBE2J2 | KCTD14 | RNF31 | PSMC3 |
| UBE2K | KCTD15 | RNF32 | PSMC3IP |
| UBE2L3 | KCTD17 | RNF34 | PSMC4 |
| UBE2L6 | KCTD2 | RNF38 | PSMC5 |
| UBE2M | KCTD20 | RNF4 | PSMC6 |
| UBE2N | KCTD21 | RNF40 | PSMD1 |
| UBE2NL | KCTD3 | RNF41 | PSMD10 |
| UBE2O | KCTD5 | RNF43 | PSMD11 |
| UBE2Q1 | KCTD6 | RNF44 | PSMD12 |
| UBE2Q2 | KCTD9 | RNF5 | PSMD13 |
| UBE2R2 | KDM2A | RNF6 | PSMD2 |
| UBE2S | KDM2B | RNF7 | PSMD3 |
| UBE2T | KEAP1 | RNF8 | PSMD4 |
| UBE2U | AREL1 | RNFT1 | PSMD5 |
| UBE2V1 | KLHL42 | RSPRY1 | PSMD6 |
| UBE2V2 | KLHL1 | SF3B3 | PSMD8 |
| UBE2W | KLHL11 | SH3RF2 | PSMD9 |
| UBE2Z | KLHL12 | SHKBP1 | PSME1 |
| ATG10 | KLHL13 | SIAH1 | PSME2 |
| ATG3 | KLHL14 | SIAH2 | PSME3 |
| BIRC6 | KLHL15 | SKP2 | PSME4 |
| CDC34 | KLHL17 | SMURF1 | PSMF1 |
| ABTB1 | KLHL18 | SMURF2 | PSMG1 |
| AMFR | KLHL20 | SOCS1 | PSMG2 |
| ANAPC11 | KLHL21 | SOCS2 | PSMG3 |
| ANKFY1 | KLHL22 | SOCS3 | PSMG4 |
| ANKIB1 | KLHL23 | SOCS4 | POMP |
| ZFAND4 | KLHL24 | SOCS5 | KIAA0368 |
| ARIH1 | KLHL25 | SOCS6 | ADRM1 |
| ARIH2 | KLHL26 | SOCS7 | PAAF1 |
| ARMC5 | KLHL28 | SPOP | ATXN3 |
| ASB10 | KLHL29 | SPOPL | ATXN3L |
| ASB11 | KLHL3 | TRIM51 | BAP1 |
| ASB13 | KLHL31 | SPSB1 | BRCC3 |
| ASB14 | KLHL32 | SPSB2 | COPS5 |
| ASB16 | KLHL36 | SPSB3 | COPS6 |
| ASB17 | KLHL38 | SPSB4 | CYLD |
| ASB18 | KLHL5 | STUB1 | EIF3F |
| ASB2 | KLHL6 | SYVN1 | EIF3H |
| ASB3 | KLHL7 | TCEB3 | JOSD1 |
| ASB4 | KLHL8 | TNFAIP1 | JOSD2 |
| ASB5 | KLHL9 | TOPORS | MPND |
| ASB6 | KRT8 | TRAF2 | MYSM1 |
| ASB7 | LGALS3BP | TRAF3 | OTUB1 |
| ASB8 | LNX1 | TRAF4 | OTUB2 |
| ASB9 | LNX2 | TRAF5 | OTUD1 |
| ATRX | LONRF1 | TRAF6 | OTUD3 |
| BACH1 | LRRC29 | TRAF7 | OTUD4 |
| BACH2 | LRSAM1 | TRAIP | OTUD5 |
| BARD1 | LZTR1 | TRIM10 | OTUD6A |
| BCL6 | MAP3K1 | TRIM11 | OTUD6B |
| BCL6B | MARCH1 | TRIM13 | PAN2 |
| BFAR | MARCH2 | TRIM17 | PRPF8 |
| BIRC2 | MARCH3 | TRIM2 | STAMBP |
| BIRC3 | MARCH5 | TRIM21 | STAMBPL1 |
| BIRC8 | MARCH6 | TRIM22 | UCHL1 |
| BMI1 | MARCH7 | TRIM23 | UCHL3 |
| BRAP | MARCH8 | TRIM24 | UCHL5 |
| BRCA1 | MARCH9 | TRIM25 | USP1 |
| BTBD1 | MDM2 | TRIM26 | USP10 |
| BTBD10 | MDM4 | TRIM27 | USP11 |
| SLX4 | MEX3B | TRIM28 | USP12 |
| BTBD17 | MEX3C | TRIM3 | USP13 |
| BTBD2 | MEX3D | TRIM31 | USP14 |
| BTBD3 | LINC00638 | TRIM32 | USP15 |
| BTBD6 | MGRN1 | TRIM33 | USP16 |
| BTBD7 | MIB1 | TRIM34 | USP17 |
| BTBD8 | MIB2 | TRIM35 | USP17L6P |
| BTBD9 | MID1 | TRIM37 | USP18 |
| BTRC | MID2 | TRIM38 | USP19 |
| HECTD4 | MKRN1 | TRIM39 | USP2 |
| IRF2BPL | MKRN2 | TRIM4 | USP20 |
| CBL | MKRN3 | TRIM40 | USP21 |
| CBLB | MNAT1 | TRIM41 | USP22 |
| CBLC | MSL2 | TRIM42 | USP24 |
| CBLL1 | MUL1 | TRIM43 | USP25 |
| CCIN | MYCBP2 | TRIM45 | USP26 |
| CCNB1IP1 | MYLIP | TRIM48 | USP27X |
| CCNF | MYNN | TRIM49 | USP28 |
| CGRRF1 | NACC1 | TRIM5 | USP29 |
| CHFR | NACC2 | TRIM50 | USP3 |
| CISH | NEDD4 | TRIM52 | USP30 |
| CNOT4 | NEDD4L | TRIM55 | USP31 |
| CPSF1 | NEURL2 | TRIM56 | USP32 |
| CUL9 | NEURL3 | TRIM59 | USP33 |
| DCST1 | NFX1 | TRIM6 | USP34 |
| DDB1 | NFXL1 | TRIM60 | USP35 |
| DPF1 | NHLRC1 | TRIM61 | USP36 |
| DTX1 | NOSIP | TRIM62 | USP37 |
| DTX2 | NSMCE1 | TRIM64 | USP38 |
| DTX3 | OSTM1 | TRIM65 | USP39 |
| DTX3L | PARK2 | TRIM67 | USP4 |
| DZIP3 | PATZ1 | TRIM68 | USP40 |
| ECT2L | PCGF1 | TRIM69 | USP42 |
| FANCL | PCGF2 | TRIM7 | USP43 |
| FBXL12 | PCGF3 | TRIM72 | USP45 |
| FBXL13 | PCGF5 | TRIM74 | USP46 |
| FBXL14 | PCGF6 | TRIM77 | USP47 |
| FBXL15 | PDZRN3 | TRIM8 | USP48 |
| FBXL16 | PEX10 | TRIM9 | USP5 |
| USP6 | USP8 | USPL1 | USP50 |
| USP6NL | USP9X | VCPIP1 | USP51 |
| USP7 | USP9Y | YOD1 | USP53 |
| ZRANB1 |  |  |  |

Table legends

Supplementary Table 1: Based on previously published literature, 797 ubiquitin proteasome system related genes were collected.

**Supplemental table 2.** Gene Ontology (GO) & Kyoto Encyclopedia of Genes and Genomes (KEGG) Terminology Note for Figure 3C.

| ONTOLOGY | ID | Description |
| --- | --- | --- |
| BP | GO:0034976 | response to endoplasmic reticulum stress |
| BP | GO:0006979 | response to oxidative stress |
| BP | GO:0030433 | ubiquitin-dependent ERAD pathway |
| BP | GO:0070233 | negative regulation of T cell apoptotic process |
| BP | GO:0001837 | epithelial to mesenchymal transition |
| BP | GO:0002761 | regulation of myeloid leukocyte differentiation |
| BP | GO:0045638 | negative regulation of myeloid cell differentiation |
| BP | GO:0031398 | positive regulation of protein ubiquitination |
| CC | GO:0000835 | ER ubiquitin ligase complex |
| CC | GO:0000153 | cytoplasmic ubiquitin ligase complex |
| MF | GO:0140297 | DNA-binding transcription factor binding |
| MF | GO:0035259 | nuclear glucocorticoid receptor binding |
| MF | GO:0031625 | ubiquitin protein ligase binding |
| MF | GO:0005172 | vascular endothelial growth factor receptor binding |
| KEGG | hsa05415 | Diabetic cardiomyopathy |
| KEGG | hsa05012 | Parkinson disease |
| KEGG | hsa05010 | Alzheimer disease |
| KEGG | hsa04350 | TGF-beta signaling pathway |

Table legends

Supplementary Table 2: The categories of GO and KEGG terms we used in Figure 3C, along with their specific descriptions.

.

**Supplemental table 3.** Gene Ontology (GO) & Kyoto Encyclopedia of Genes and Genomes (KEGG) Terminology Note for Figure 3D.

| ONTOLOGY | ID | Description |
| --- | --- | --- |
| BP | GO:0019882 | antigen processing and presentation |
| BP | GO:0002449 | lymphocyte mediated immunity |
| BP | GO:0031397 | negative regulation of protein ubiquitination |
| BP | GO:0051251 | positive regulation of lymphocyte activation |
| BP | GO:0019724 | B cell mediated immunity |
| BP | GO:0042098 | T cell proliferation |
| CC | GO:0005911 | cell-cell junction |
| CC | GO:0042611 | MHC protein complex |
| CC | GO:0000502 | proteasome complex |
| CC | GO:0019774 | proteasome core complex, beta-subunit complex |
| MF | GO:0044389 | ubiquitin-like protein ligase binding |
| MF | GO:0031625 | ubiquitin protein ligase binding |
| MF | GO:0042608 | T cell receptor binding |
| MF | GO:0055106 | ubiquitin-protein transferase regulator activity |
| KEGG | hsa04514 | Cell adhesion molecules |
| KEGG | hsa04612 | Antigen processing and presentation |
| KEGG | hsa04659 | Th17 cell differentiation |
| KEGG | hsa04658 | Th1 and Th2 cell differentiation |

Table legends

Supplementary Table 3: The categories of GO and KEGG terms we used in Figure 3D, along with their specific descriptions.

**Supplemental table 4.** Gene Ontology (GO) & Kyoto Encyclopedia of Genes and Genomes (KEGG) Terminology Note for Figure 7A.

| ONTOLOGY | ID | Description |
| --- | --- | --- |
| BP | GO:0045785 | positive regulation of cell adhesion |
| BP | GO:0019882 | antigen processing and presentation |
| BP | GO:0007159 | leukocyte cell-cell adhesion |
| BP | GO:0045216 | cell-cell junction organization |
| BP | GO:0001819 | positive regulation of cytokine production |
| BP | GO:0019884 | antigen processing and presentation of exogenous antigen |
| BP | GO:0070661 | leukocyte proliferation |
| BP | GO:0050863 | regulation of T cell activation |
| BP | GO:0050867 | positive regulation of cell activation |
| BP | GO:0051251 | positive regulation of lymphocyte activation |
| BP | GO:0007249 | I-kappaB kinase/NF-kappaB signaling |
| BP | GO:0050870 | positive regulation of T cell activation |
| BP | GO:0032944 | regulation of mononuclear cell proliferation |
| BP | GO:0032943 | mononuclear cell proliferation |
| BP | GO:0002460 | adaptive immune response based on somatic recombination of immune receptors built from immunoglobulin superfamily domains |
| CC | GO:0005911 | cell-cell junction |
| CC | GO:0042611 | MHC protein complex |
| CC | GO:0005912 | adherens junction |
| MF | GO:0098631 | cell adhesion mediator activity |
| MF | GO:0044389 | ubiquitin-like protein ligase binding |
| MF | GO:0031625 | ubiquitin protein ligase binding |
| KEGG | hsa04530 | Tight junction |
| KEGG | hsa04514 | Cell adhesion molecules |
| KEGG | hsa04659 | Th17 cell differentiation |
| KEGG | hsa04670 | Leukocyte transendothelial migration |
| KEGG | hsa04612 | Antigen processing and presentation |
| KEGG | hsa04390 | Hippo signaling pathway |
| KEGG | hsa04210 | Apoptosis |

Table legends

Supplementary Table 4: The categories of GO and KEGG terms we used in Figure 7A, along with their specific descriptions.

**Supplemental table 5.** Gene Ontology (GO) & Kyoto Encyclopedia of Genes and Genomes (KEGG) Terminology Note for Figure 7B.

| ONTOLOGY | ID | Description |
| --- | --- | --- |
| BP | GO:0034976 | response to endoplasmic reticulum stress |
| BP | GO:0006979 | response to oxidative stress |
| BP | GO:0030433 | ubiquitin-dependent ERAD pathway |
| BP | GO:0036503 | ERAD pathway |
| BP | GO:0034599 | cellular response to oxidative stress |
| BP | GO:2001242 | regulation of intrinsic apoptotic signaling pathway |
| BP | GO:0097193 | intrinsic apoptotic signaling pathway |
| BP | GO:0009060 | aerobic respiration |
| BP | GO:0006091 | generation of precursor metabolites and energy |
| BP | GO:0045333 | cellular respiration |
| BP | GO:0006119 | oxidative phosphorylation |
| MF | GO:0009055 | electron transfer activity |
| MF | GO:0015453 | oxidoreduction-driven active transmembrane transporter activity |
| MF | GO:0015078 | proton transmembrane transporter activity |
| MF | GO:0015399 | primary active transmembrane transporter activity |
| CC | GO:0098798 | mitochondrial protein-containing complex |
| CC | GO:0005743 | mitochondrial inner membrane |
| CC | GO:0098800 | inner mitochondrial membrane protein complex |
| CC | GO:0098803 | respiratory chain complex |
| KEGG | hsa05415 | Diabetic cardiomyopathy |
| KEGG | hsa05012 | Parkinson disease |
| KEGG | hsa05208 | Chemical carcinogenesis - reactive oxygen species |
| KEGG | hsa00190 | Oxidative phosphorylation |
| KEGG | hsa00020 | Citrate cycle (TCA cycle) |

Table legends

Supplementary Table 5: The categories of GO and KEGG terms we used in Figure 7B, along with their specific descriptions.
